# Supplementary material for: Design and Antioxidant Properties of Bifunctional 2H-Imidazole-Derived Phenolic Compounds—A New Family of Effective Inhibitors for Oxidative Stress-Associated Destructive Processes
Source: MDPI journal article supplement (doi:10.3390/molecules26216534), 2021-10-29
Supplement: s1 [file s1]

# **Design and antioxidant properties of bifunctional 2H-imidazole-derived phenolic compounds - a new family of effective inhibitors for oxidative stress-associated destructive processes**

Gerasimova E.L.<sup>1</sup>, Gazizullina E.R.<sup>1</sup>, Borisova M.V.<sup>1</sup>, Igdisanova D.I.<sup>1</sup>, Nikiforov E.A.<sup>1</sup>, Moseev T.D.<sup>1</sup>, Varaksin M.V.<sup>1,2</sup>, Chupakhin O.N.<sup>1,2</sup>, Charushin V.N.<sup>1,2</sup>, Ivanova A.V.<sup>1</sup>

<sup>1</sup> *Ural Federal University, 19 Mira Str., 620002 Ekaterinburg, Russia*

<sup>2</sup> *Postovsky Institute of Organic Synthesis, Ural Branch of the Russian Academy of Sciences, 22 S. Kovalevskaya Str., 620990 Ekaterinburg, Russia*

## **Table of contents**

|                                                                                                                     |            |
|---------------------------------------------------------------------------------------------------------------------|------------|
| <b>1. Copies of NMR spectra .....</b>                                                                               | <b>S2</b>  |
| <b>2. Correlation between the position of the oxidation peak for pyrogallol and hydroxyquinol derivatives .....</b> | <b>S12</b> |
| <b>3. Antioxidant capacity assay .....</b>                                                                          | <b>S13</b> |
| <b>4. Antiradical capacity assay.....</b>                                                                           | <b>S14</b> |

## 1. Copies of NMR spectra

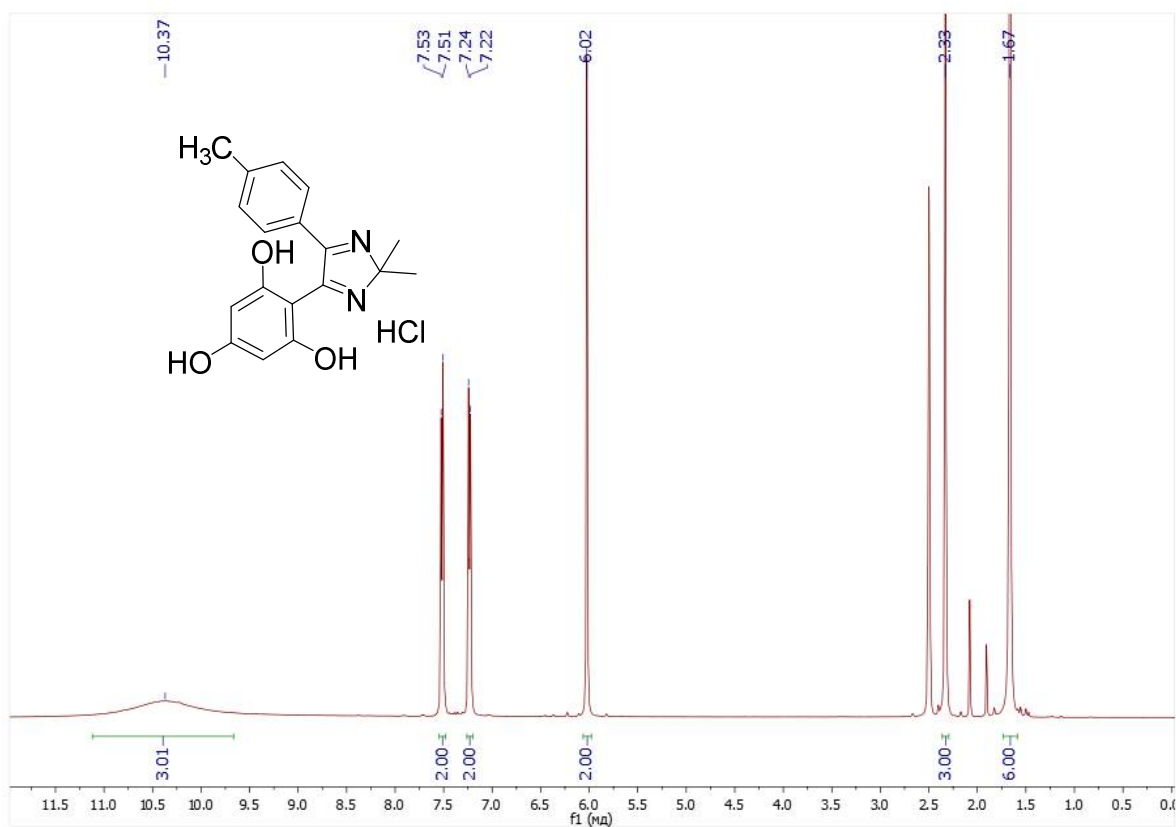

Figure S1. <sup>1</sup>H NMR spectrum (400 MHz, DMSO-d<sub>6</sub>) of compound **Im1PhI**

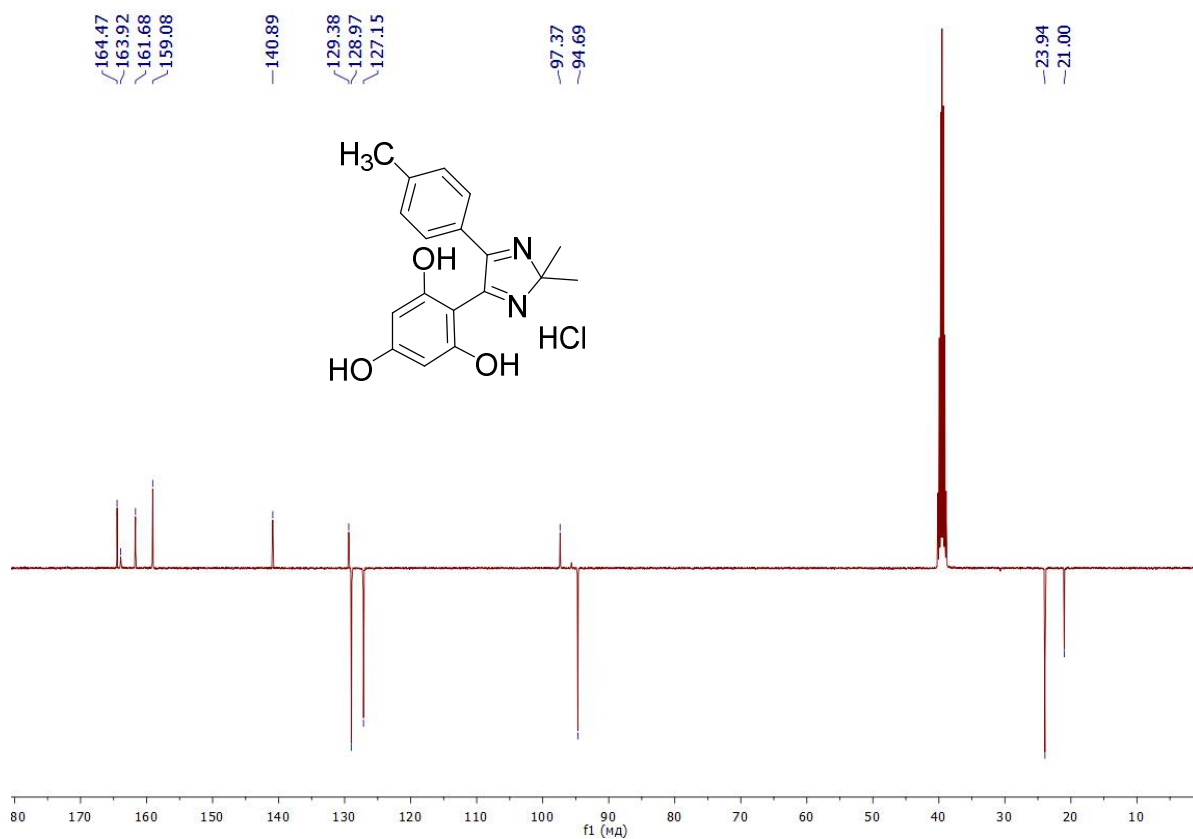

Figure S2. <sup>13</sup>C{<sup>1</sup>H} NMR spectrum (101 MHz, DMSO-d<sub>6</sub>) of compound **Im1PhI**

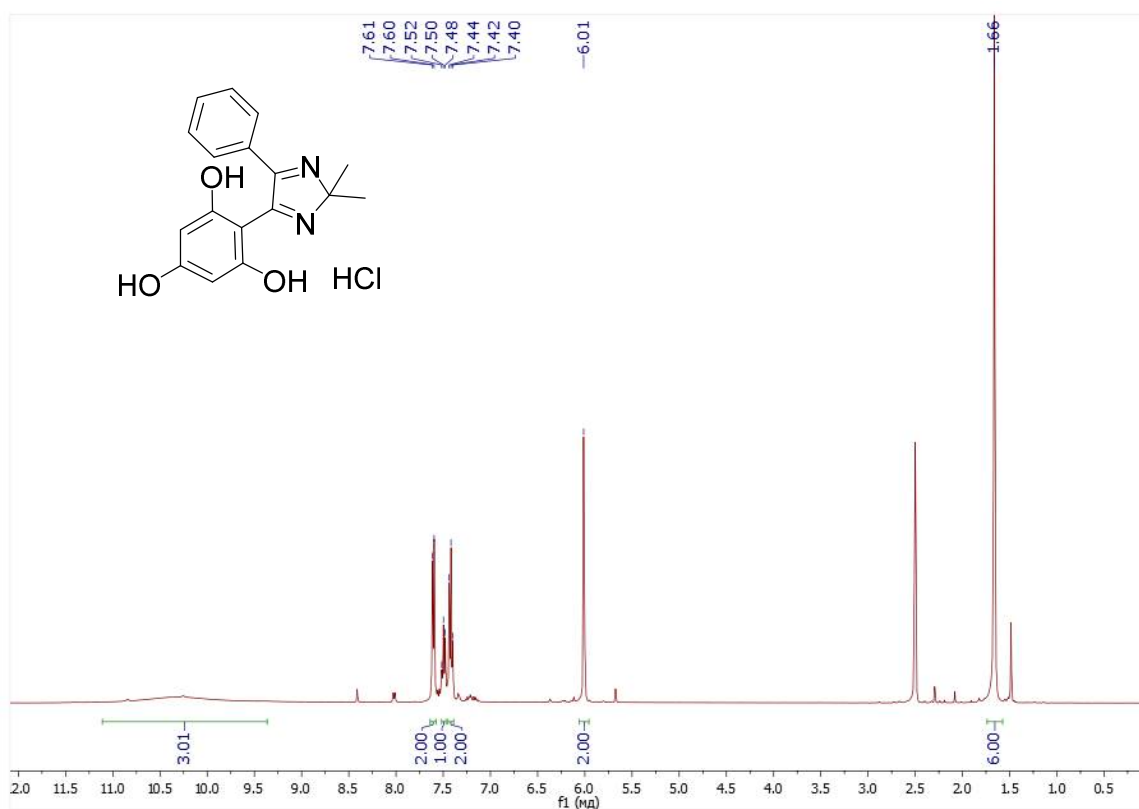

Figure S3.  $^1\text{H}$  NMR spectrum (400 MHz,  $\text{DMSO-d}_6$ ) of compound **Im2PhI**

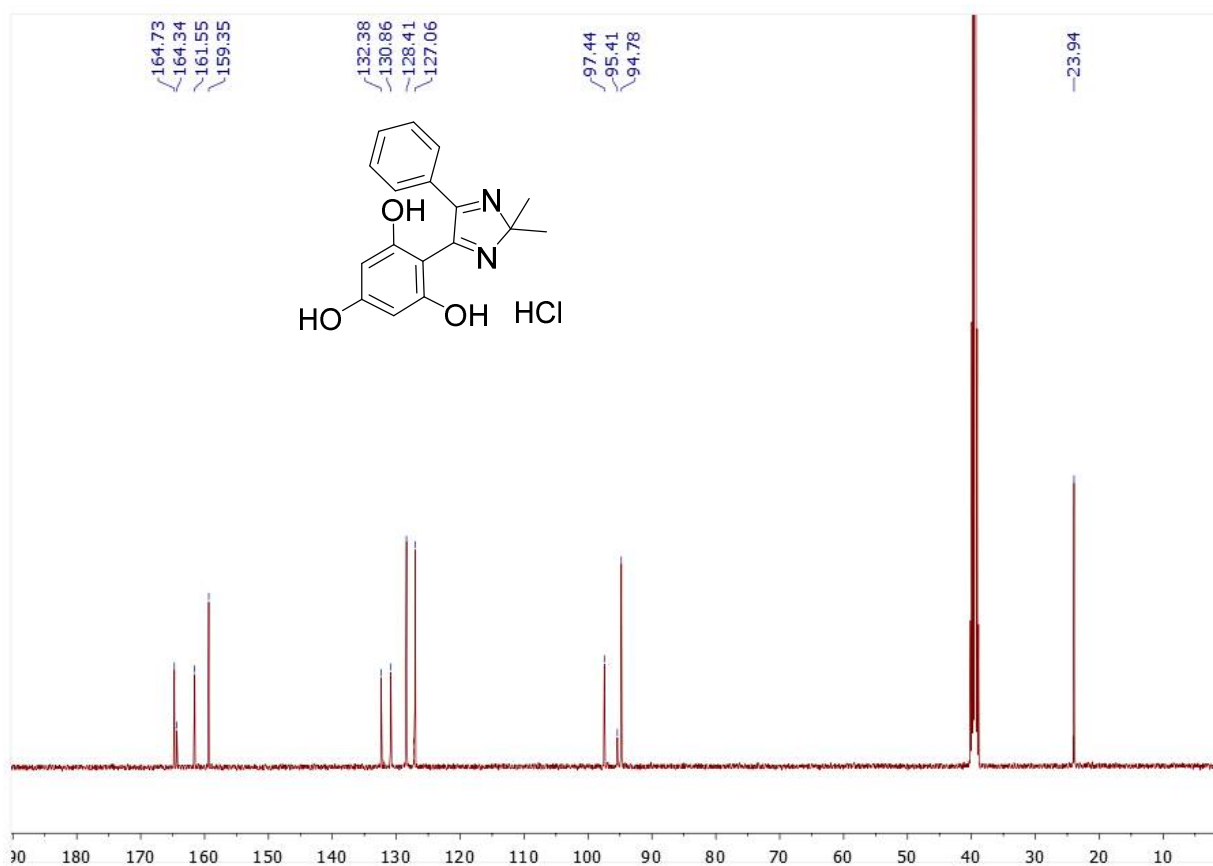

Figure S4.  $^{13}\text{C}\{^1\text{H}\}$  NMR spectrum (101 MHz,  $\text{DMSO-d}_6$ ) of compound **Im2PhI**

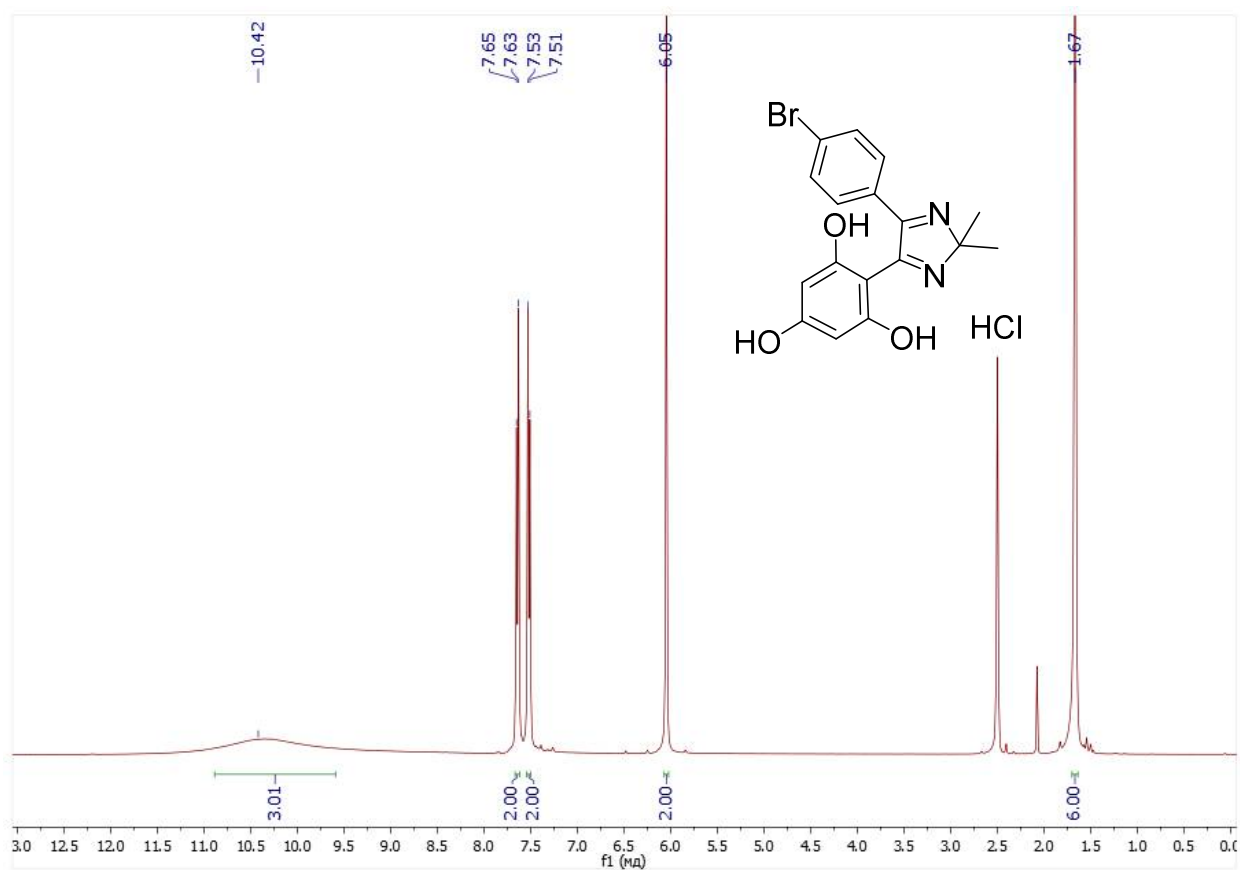

Figure S5. <sup>1</sup>H NMR spectrum (400 MHz, DMSO-d<sub>6</sub>) of compound **Im3PhI**

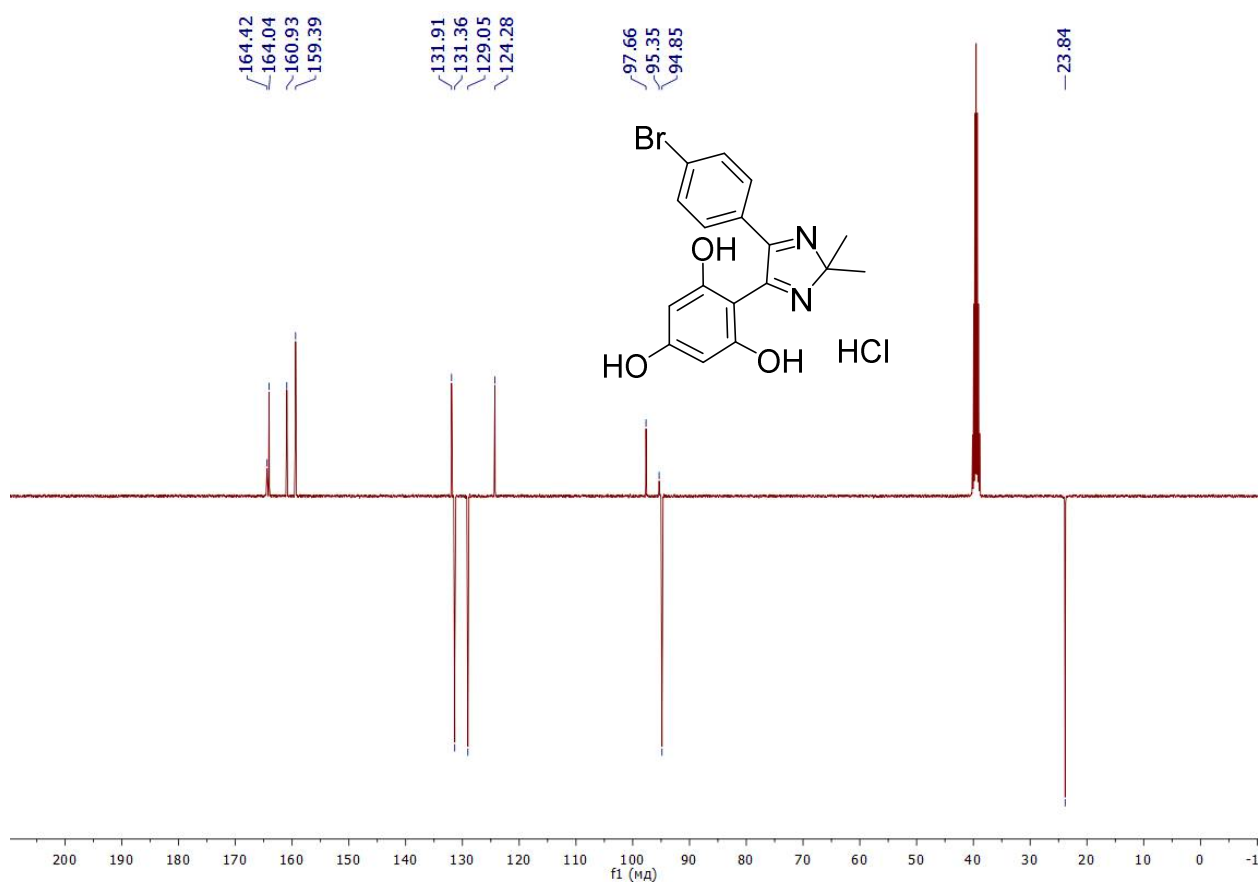

Figure S6. <sup>13</sup>C{<sup>1</sup>H} NMR spectrum (101 MHz, DMSO-d<sub>6</sub>) of compound **Im3PhI**

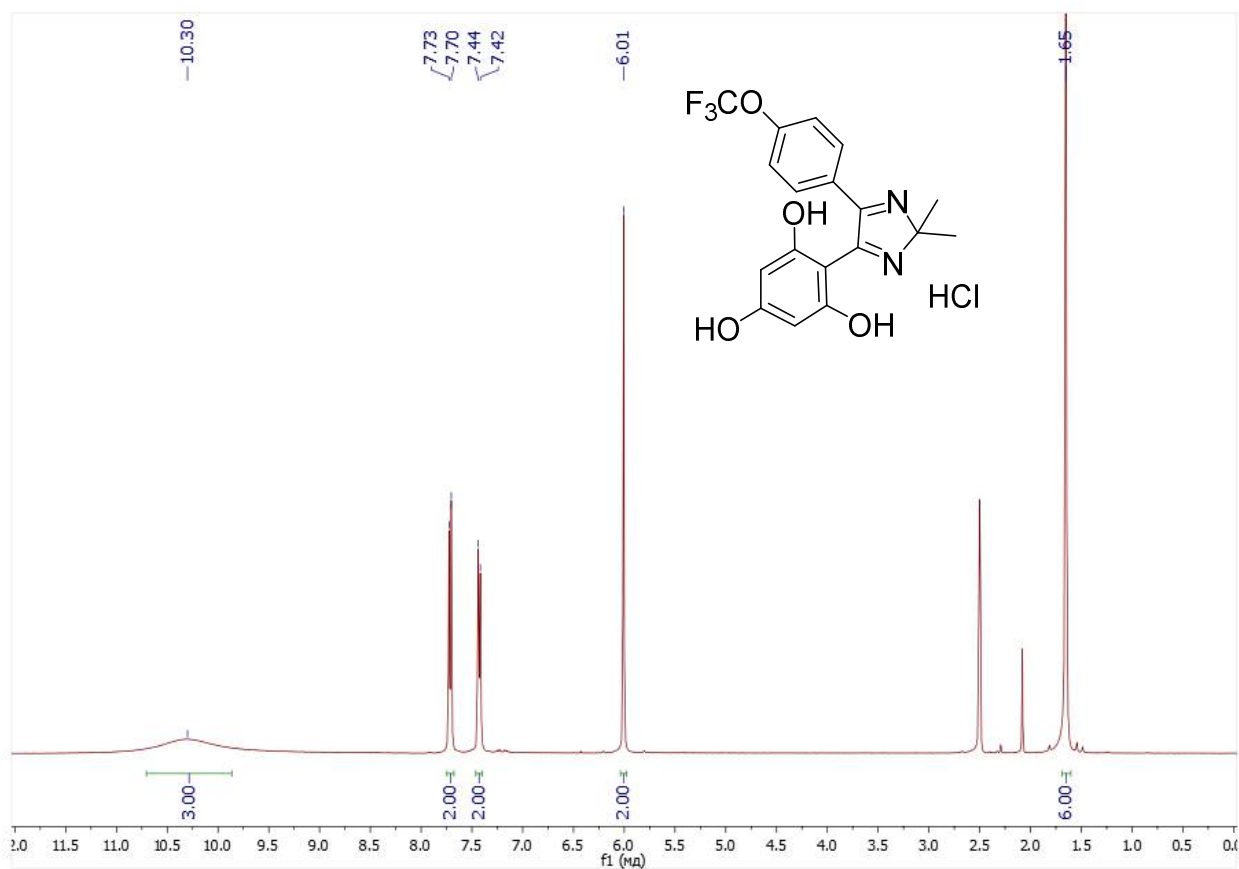

Figure S7. <sup>1</sup>H NMR spectrum (400 MHz, DMSO-d<sub>6</sub>) of compound **Im4PhI**

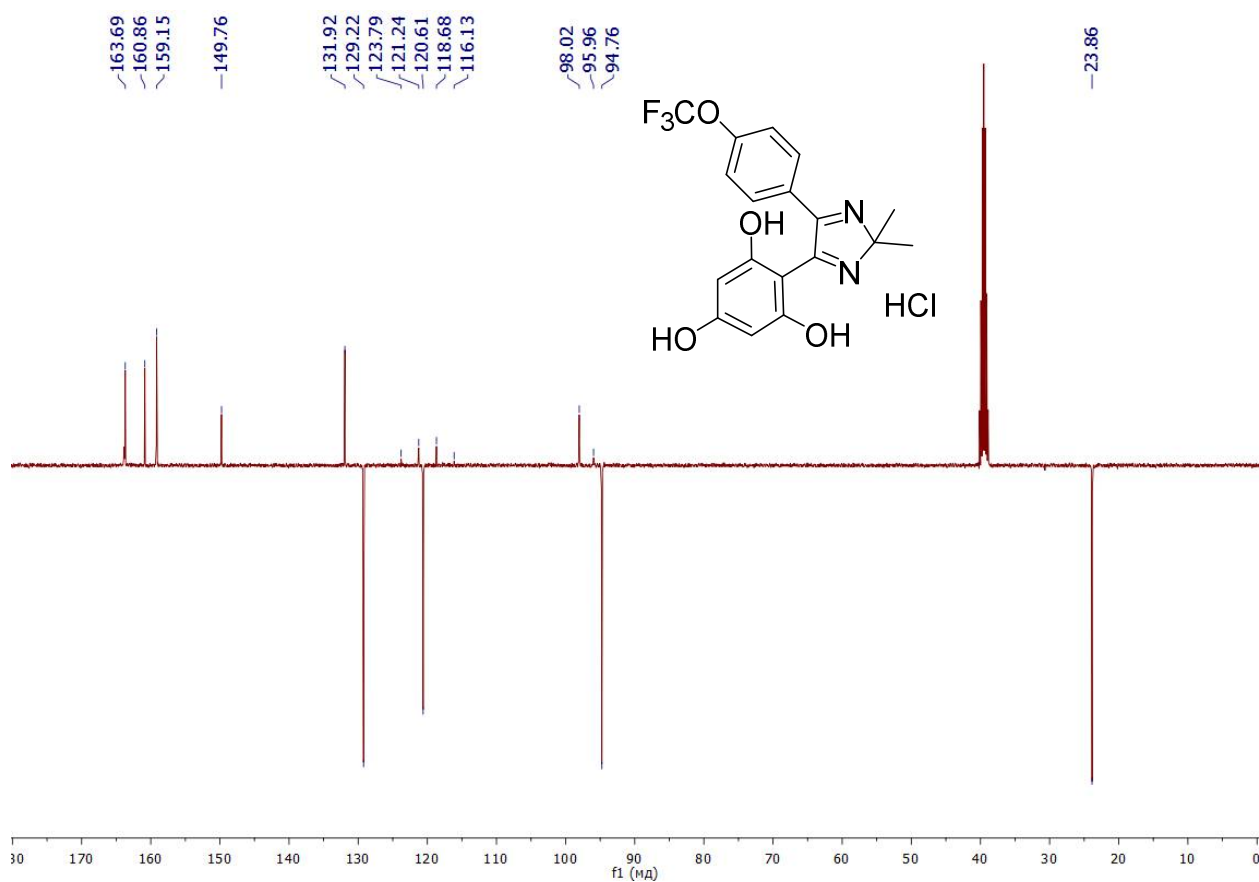

Figure S8. <sup>13</sup>C{<sup>1</sup>H} NMR spectrum (101 MHz, DMSO-d<sub>6</sub>) of compound **Im4PhI**

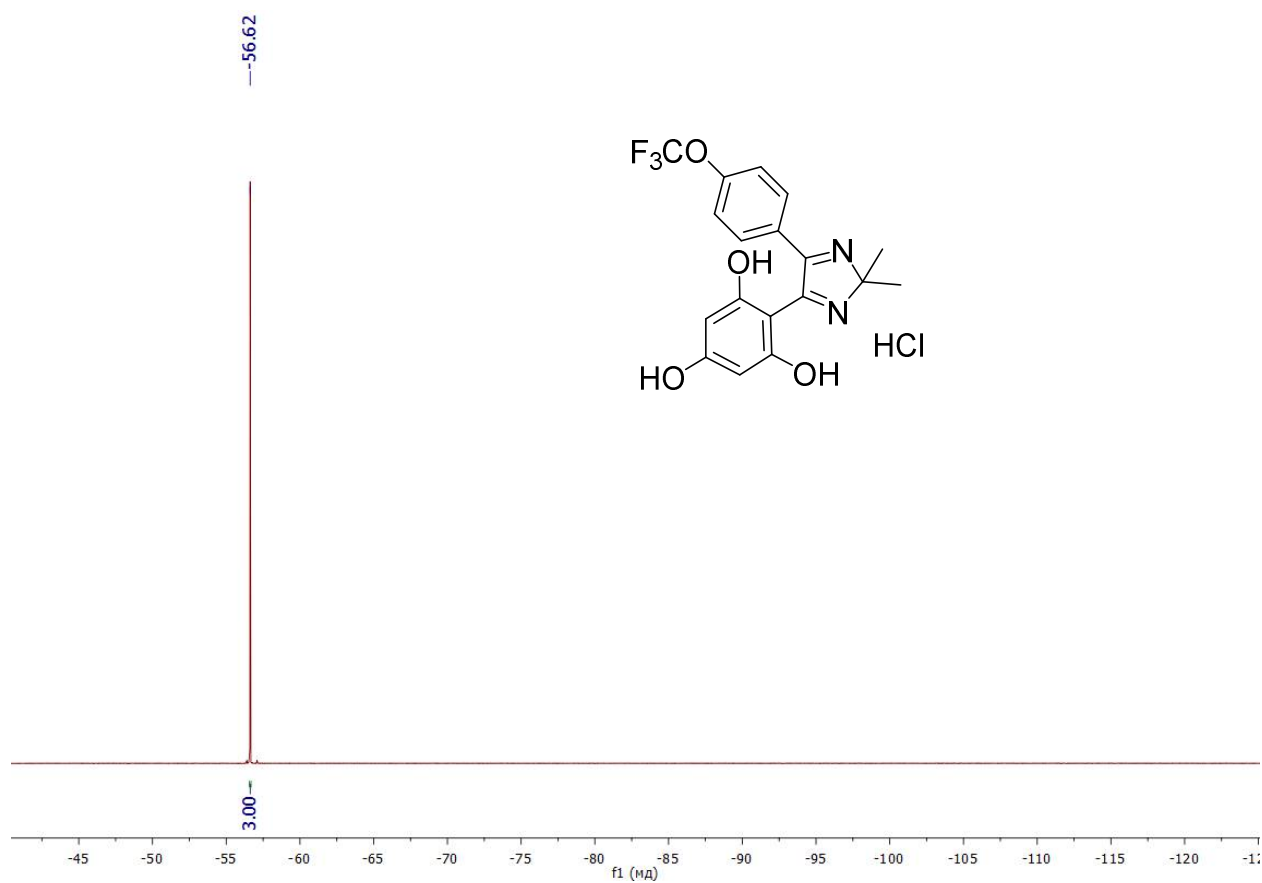

Figure S9.  $^{19}\text{F}$  NMR spectrum (376 MHz,  $\text{DMSO-d}_6$ ) of compound **Im4PhI**

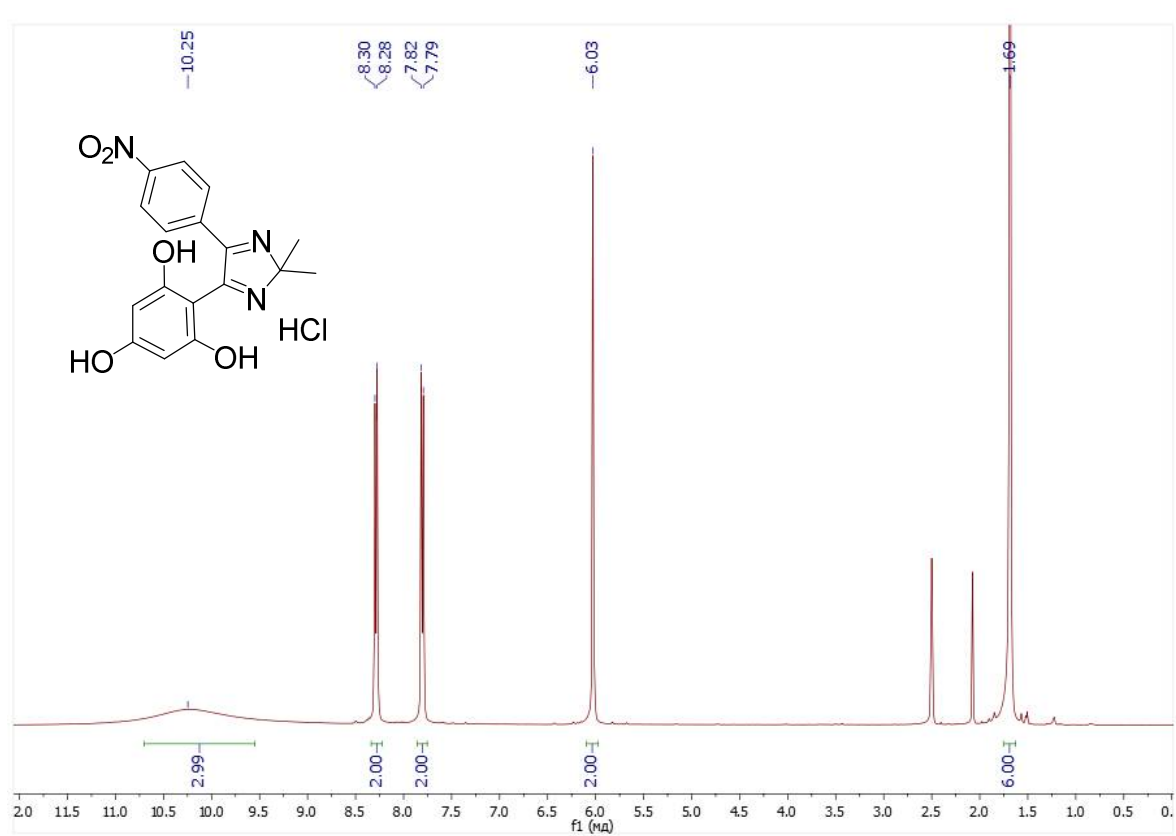

Figure S10. <sup>1</sup>H NMR spectrum (400 MHz, DMSO-d<sub>6</sub>) of compound **Im5PhI**

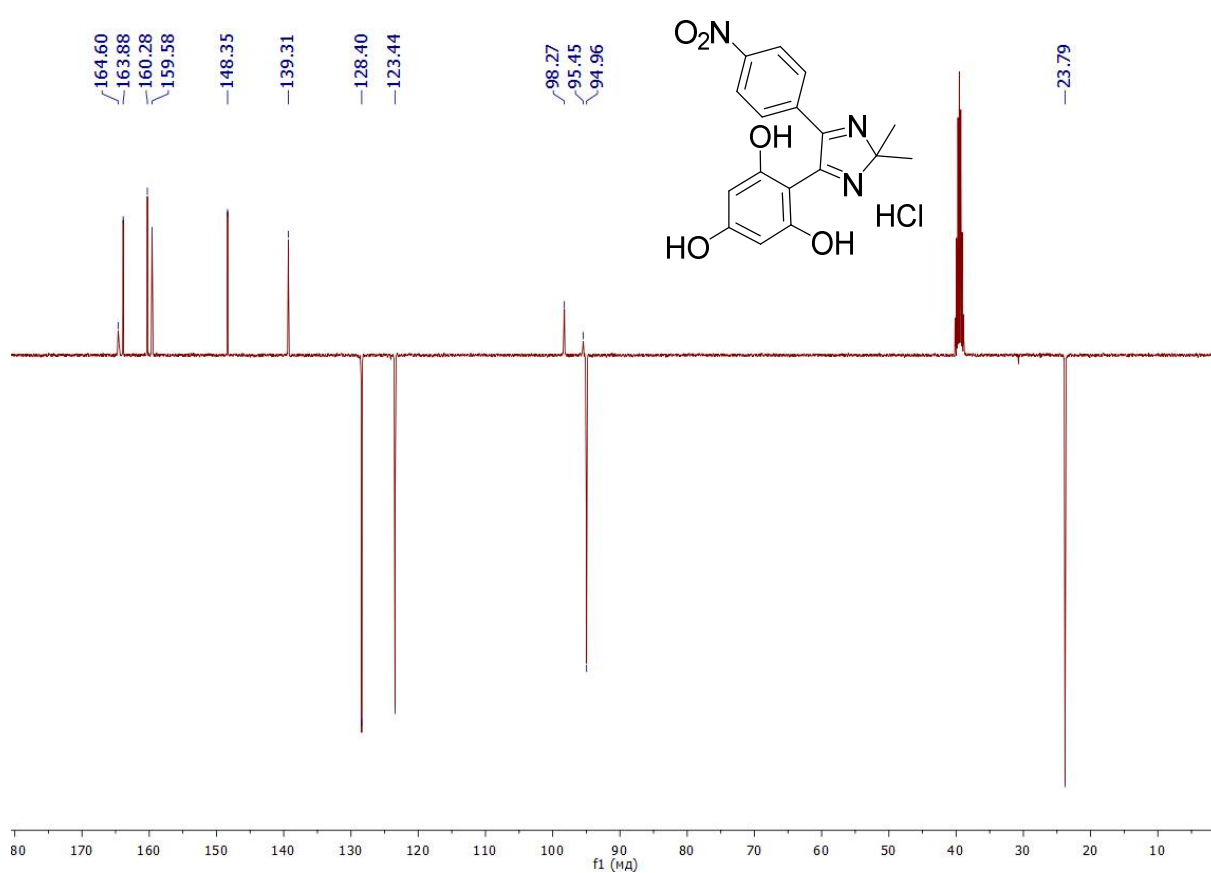

Figure S11. <sup>13</sup>C{<sup>1</sup>H} NMR spectrum (101 MHz, DMSO-d<sub>6</sub>) of compound **Im5PhI**

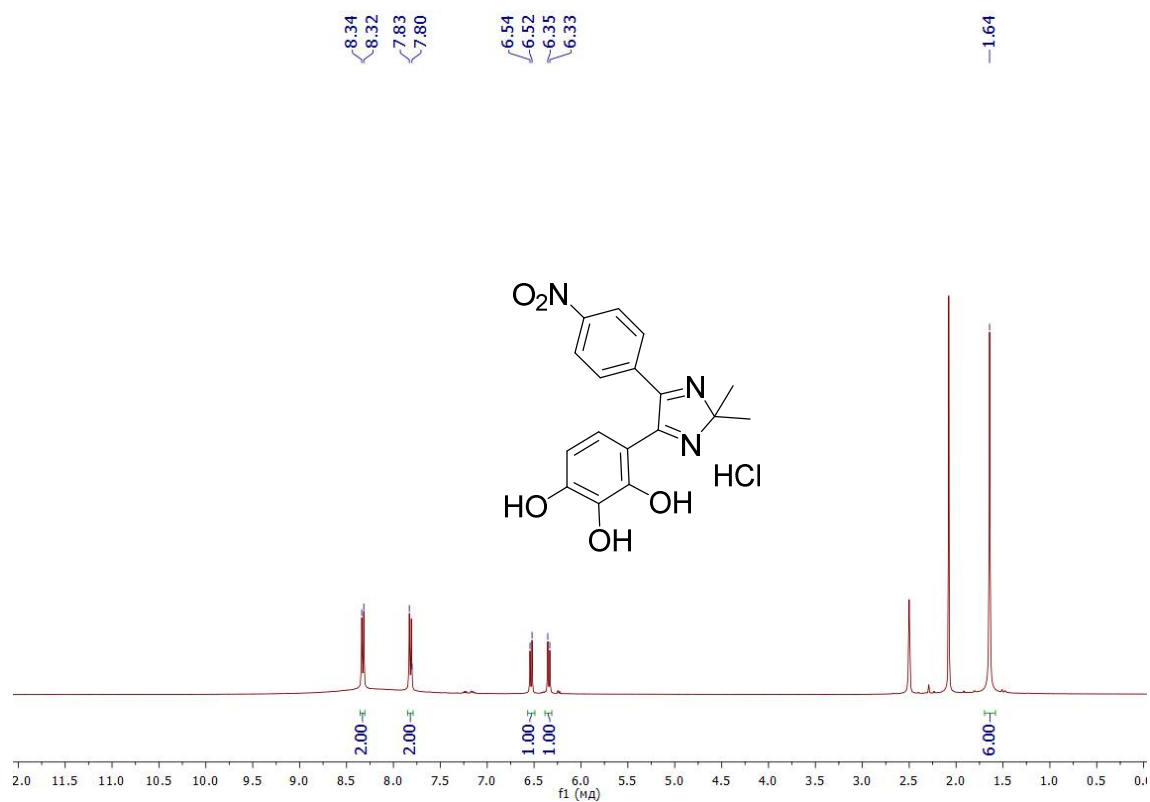

Figure S12.  $^1\text{H}$  NMR spectrum (400 MHz,  $\text{DMSO-d}_6$ ) of compound **Im5Pyr**

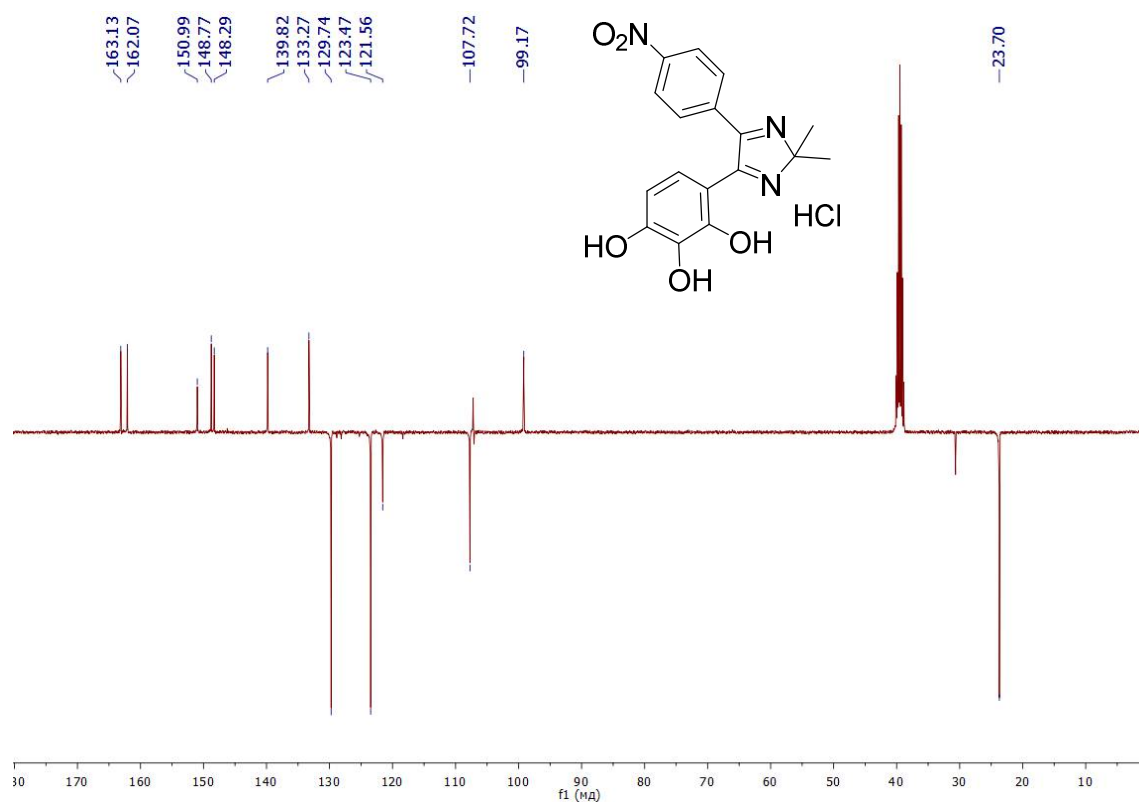

Figure S13.  $^{13}\text{C}\{^1\text{H}\}$  NMR spectrum (101 MHz,  $\text{DMSO-d}_6$ ) of compound **Im5Pyr**



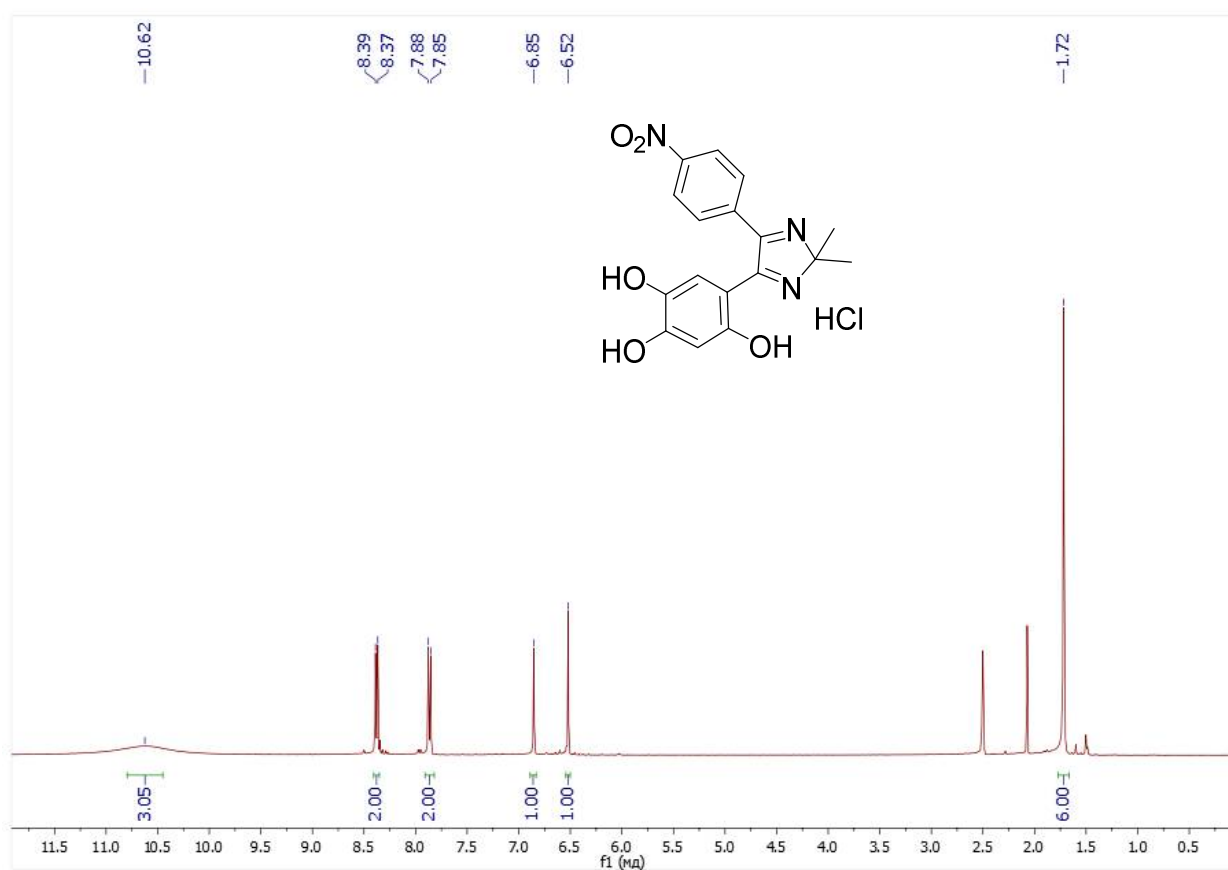

Figure S14. <sup>1</sup>H NMR spectrum (400 MHz, DMSO-d<sub>6</sub>) of compound **Im5Hyd**

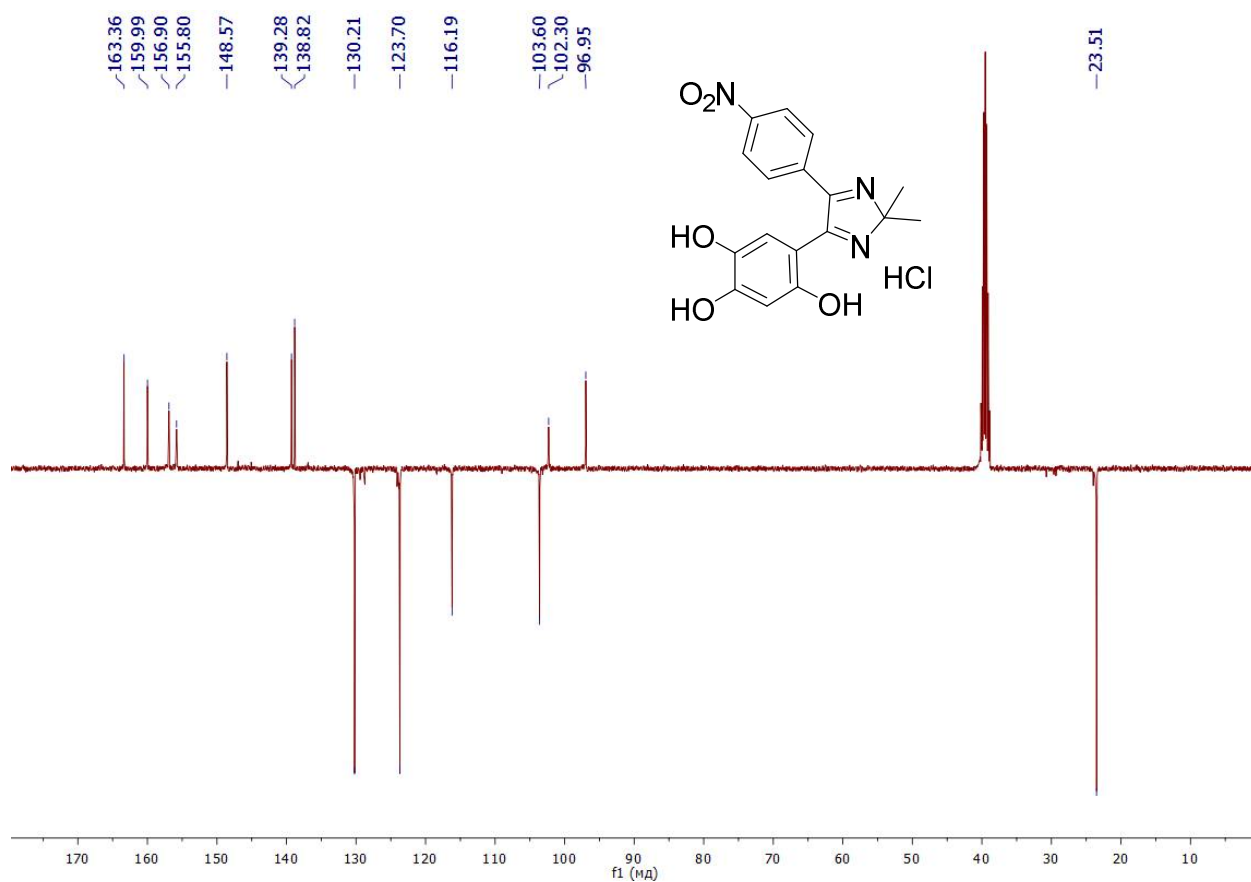

Figure S15. <sup>13</sup>C{<sup>1</sup>H} NMR spectrum (101 MHz, DMSO-d<sub>6</sub>) of compound **Im5Hyd**

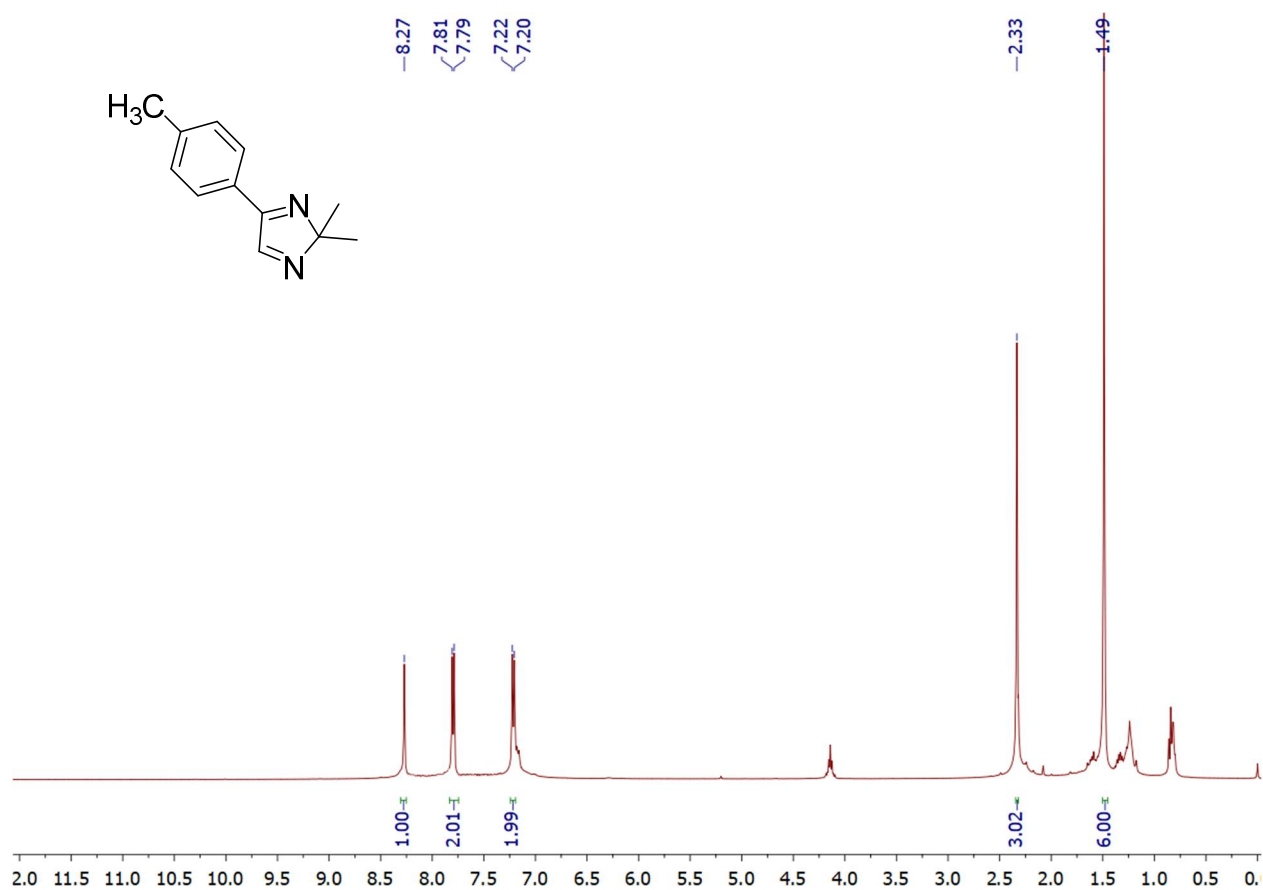

Figure S16. <sup>1</sup>H NMR spectrum (400 MHz, DCCl<sub>3</sub>) of compound **Im1**

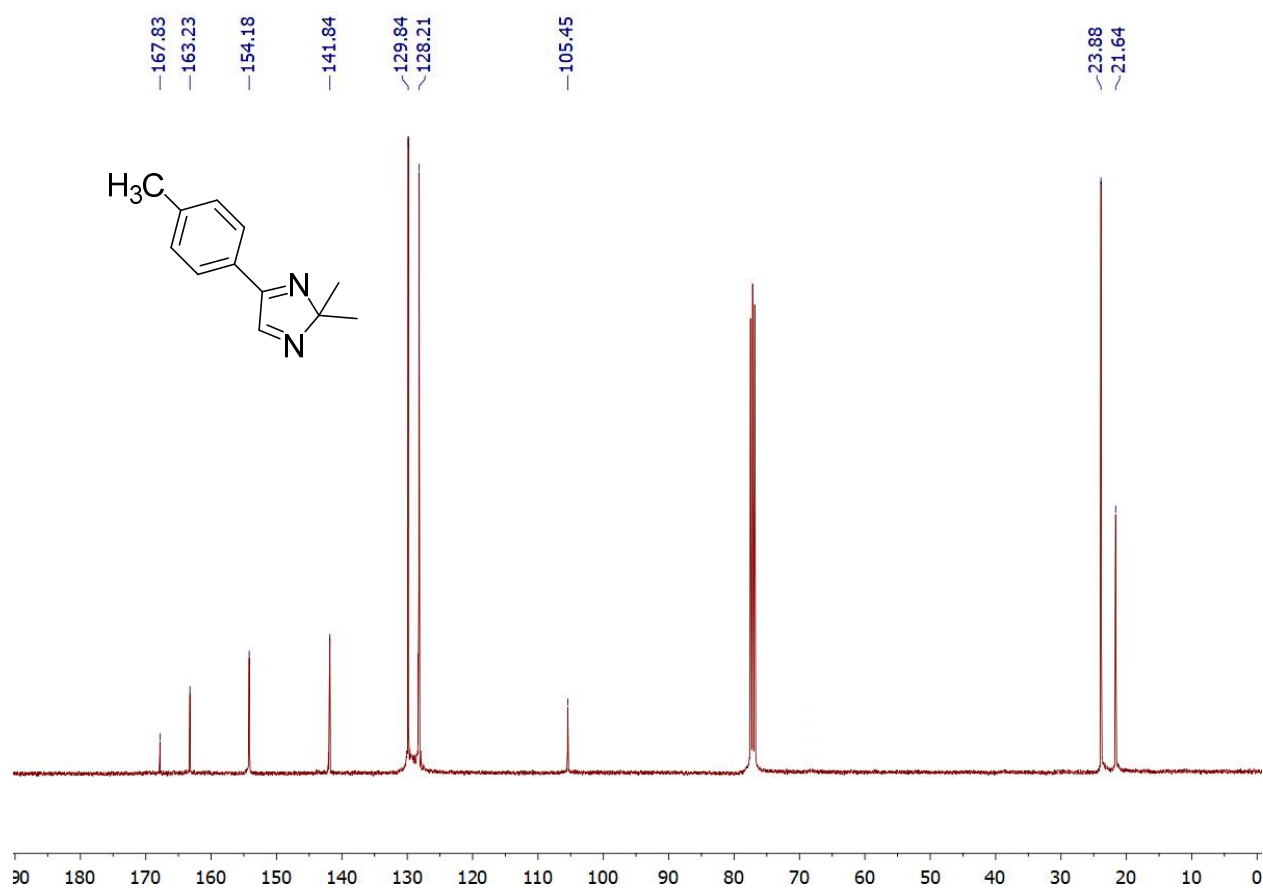

Figure S17. <sup>13</sup>C{<sup>1</sup>H} NMR spectrum (101 MHz, DCCl<sub>3</sub>) of compound **Im1**

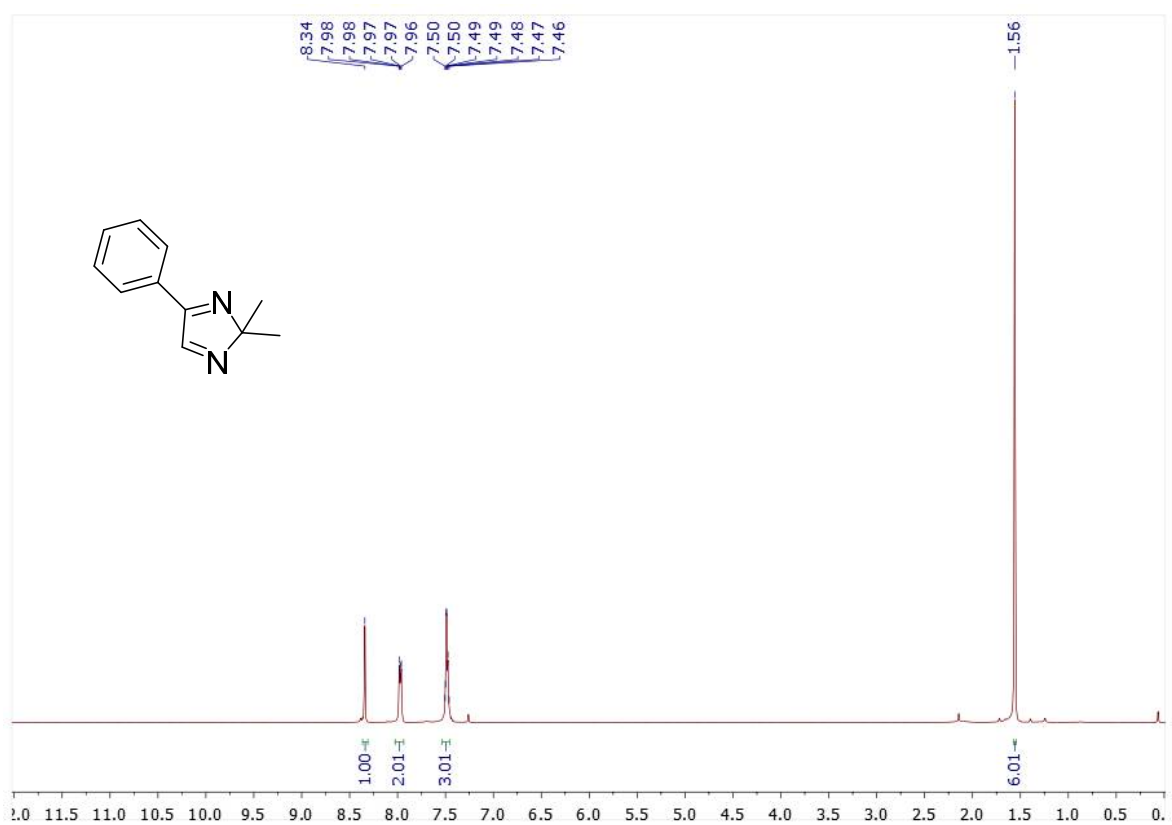

Figure S18. <sup>1</sup>H NMR spectrum (400 MHz, DCCl<sub>3</sub>) of compound **Im2**

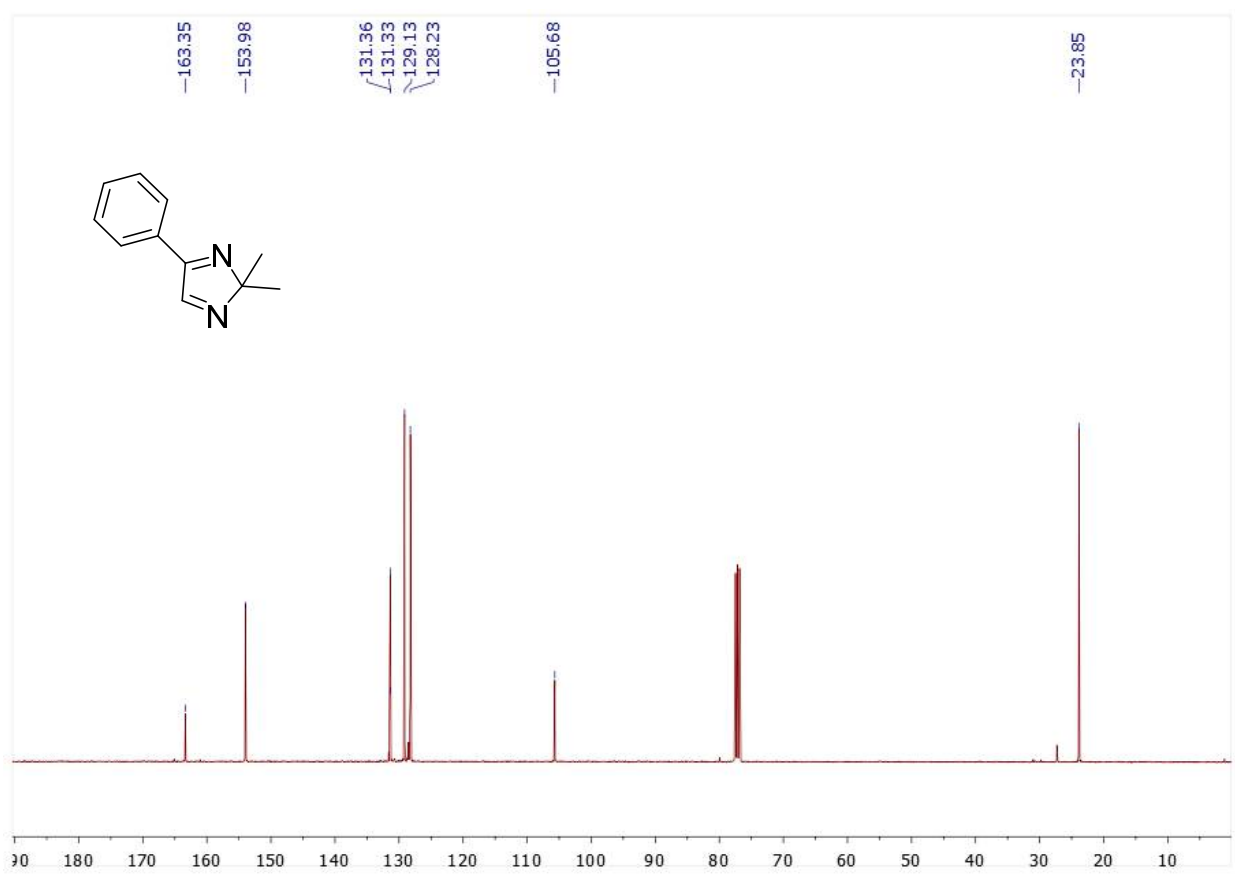

Figure S19. <sup>13</sup>C{<sup>1</sup>H} NMR spectrum (101 MHz, DCCl<sub>3</sub>) of compound **Im2**

**2. Correlation between the position of the oxidation peak and AOC for pyrogallol and hydroxyquinol derivatives**

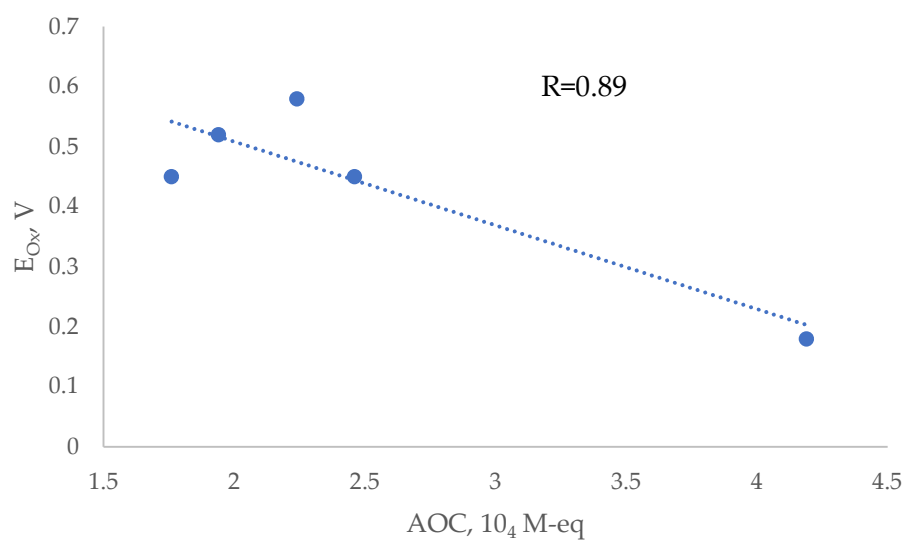

Figure S20. Correlation between the position of the oxidation peak and AOC for imidazolyipyrogallols

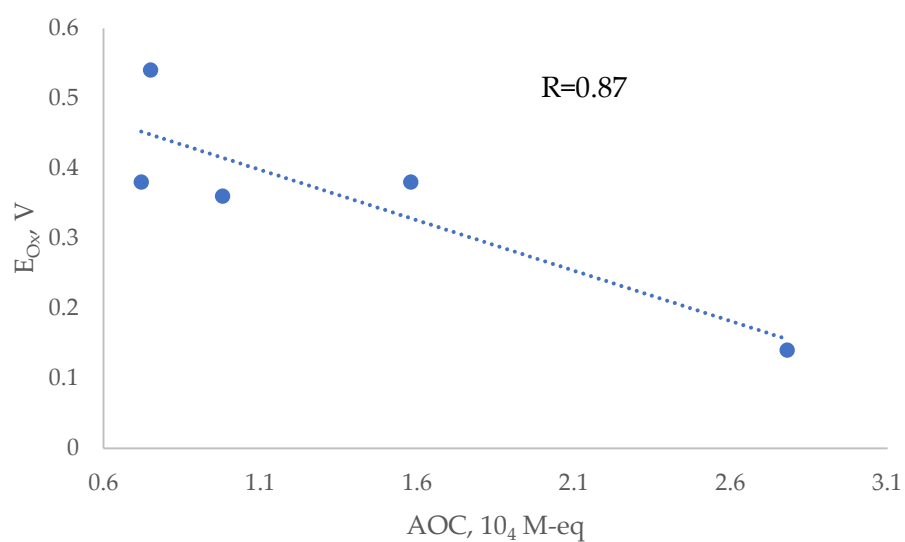

Figure S21. Correlation between the position of the oxidation peak and AOC for imidazolyhydroxyquinols

### 3. Antioxidant capacity assay

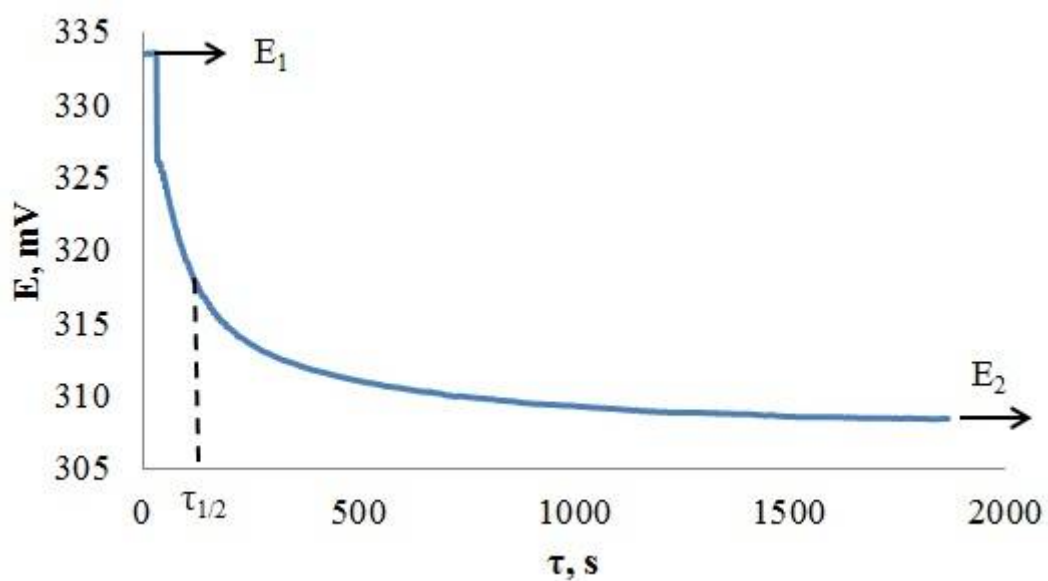

Figure S22. The curve of potential on time with the introduction of 0.1 mM **Im3PhI** into the solution containing  $K_3[Fe(CN)_6]/K_4[Fe(CN)_6]$  in a ratio of 0.01 M / 0.1 mM, respectively (pH = 7.4 PBS)

#### 4. Antiradical capacity assay

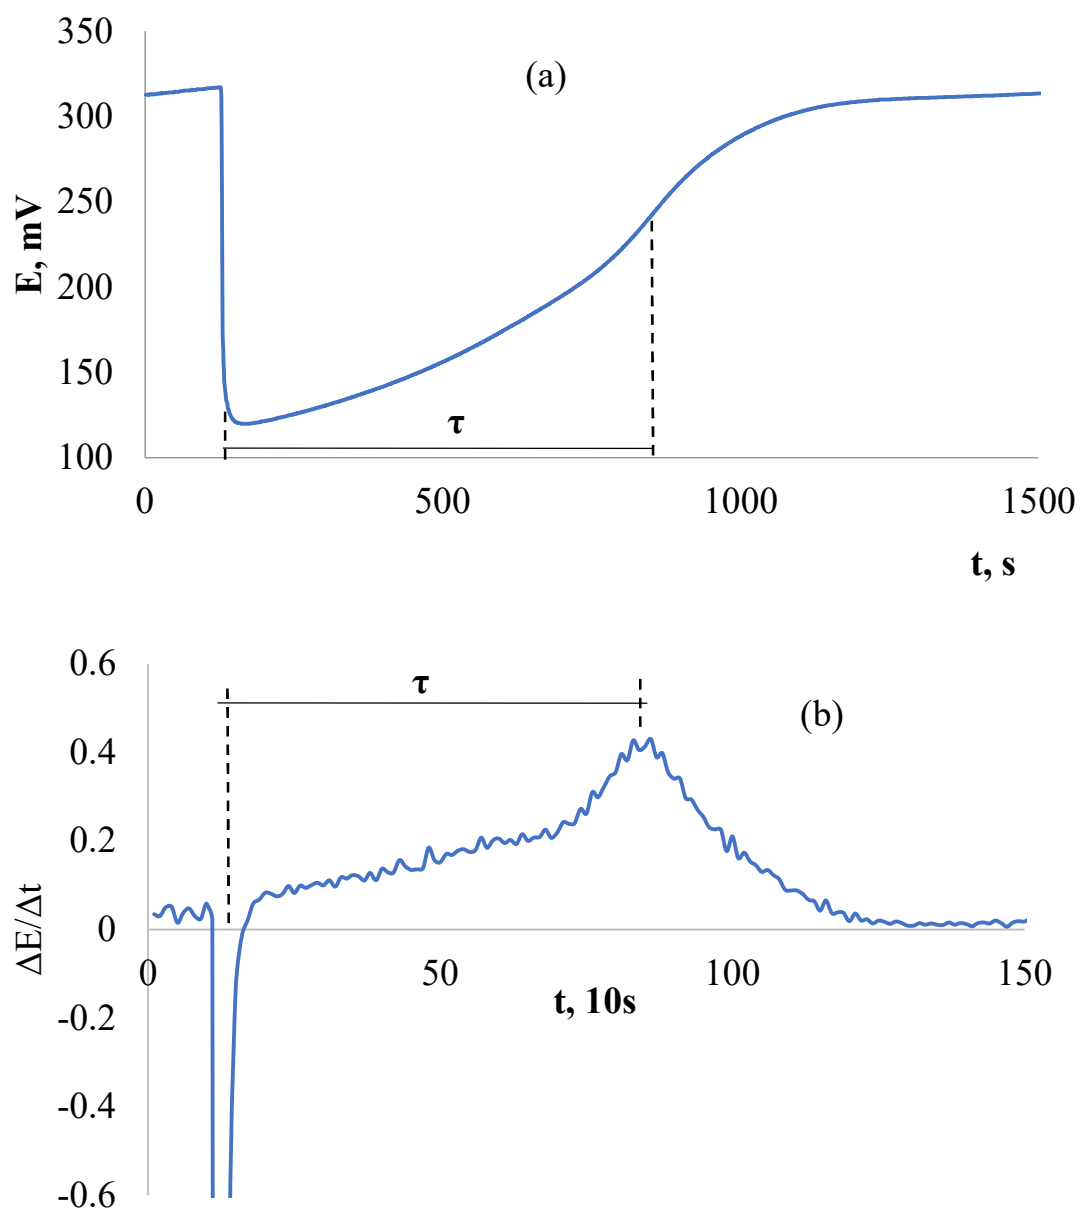

Figure S23. Integral (a) and differential (b) kinetic curves of potential on time when adding 0.1 mM **Im3PhI** to 0.1 M AAPH (pH = 7.4 PBS)
